# Supplementary material for: Counting the Founders: The Matrilineal Genetic Ancestry of the Jewish Diaspora
Source: PLoS One. 2008 Apr 30;3(4):e2062. doi: 10.1371/journal.pone.0002062 (PMC2323359; doi:10.1371/journal.pone.0002062)
Supplement: Table S2 — HVS-I motifs and coding region SNPs used for the initial Hg labeling (0.03 MB XLS) [file pone.0002062.s005.xls]

## Sheet: Table S2
Table S2
HVS-I motifs and coding region SNPs used for the initial Hg labeling
Haplogroup	HVS-I motif	Coding region mutation	Genotpying procedure
L0a1	16129 16148 16168 16172 16187 16188g 16189 16223 16230 16311 16320
L0a2	16148 16172 16187 16188g 16189 16223 16230 16311 16320
L0f	16129 16169 16172 16187 16189 16223 16230 16311 16327
L1b1	16126 16187 16189 16223 16264 16270 16278 16293 16311
L2'3'4'5'6'7		2758	direct sequencing
L2a	16223 16278 16294 16390
L2a1	16223 16278 16294 16309 16390
L2b	16114a 16129 16213 16223 16278 16390
L5	16223 16148 16166 16278 16311	8152 8155	direct sequencing
L6	16223 16224 16278 16311	13710	direct sequencing
L3'4'7		3594	+3592HpaI
L4	16223 16362	3918 8104 9855 12609 23470
L4a	16223 16362 16260
L4g	16223 16362 16293t 16355
L3		769 1018	direct sequencing
L3b	16124 16223 16278 16362
L3e1	16223 16327
L3e3	16223 16265t
L3f1	16209 16223 16292 16311
L3h	16192 16223
L3x	16169 16223	6401	direct sequencing
L3x1	16169 16223 16278		direct sequencing
M		10400	+10397AluI
M1	16129 16189 16223 16249 16311	12403	-12403MnlI
M1a1	16129 16189 16223 16249 16311 16359
M1a2	16182c 16189 16223 16249 16260 16311 16320
M1b1	16129 16185 16189 16223 16249 16311
M2	16223 16274 16319	447	+447HinfI
M3a	16126 16223	4580	-4577NlaIII
M4a	16145 16223 16261 16311	7859	-7859MboI
M5a	16129 16223	12477	direct sequencing
M6	16223 16231 16362	3537	-3537AluI
M7	none	9824	+9820HinfI
M8a	16223 16298	7196a	+7194StuI
M9	none	4491	+4491BccI
M9a	none	3394	+3394HaeIII
M10	16223 16311	10646	+10646RsaI
M25	16223 16304	15928	-15925MspI
M30	HVSII: 195a	12007	direct sequencing
C	16223 16298 16327	13263	+13262AluI
D	16223 16362	5178a	-5176AluI
D4	16223 16362	3010	-3010BccI
D5	16189 16223 16362
G	16223 16362	4833	+4830HaeII
G2	16223 16278 16362	7600	-7598HhaI
Z	16185 16223 16224 16260 16298
N		10873	+10871MnlI
N1	none	10238	+10237HphI
N1a	16147a 16172 16223 16248 16355
N1b	16145 16176g 16223
I	16129 16223 16391	10034	+10032AluI
N2a	16153 16223 16319	7581 15106	direct sequencing
W	16223 16292	8994	-8994HaeIII
X	16189 16223 16278	14470	+14465AccI
X1	none
X2	none	1719	-1715DdeI
X2b	none	8393	direct sequencing
X2d	none	8503	direct sequencing
X2e	none	15310	direct sequencing
N9a	16223 16257a 16261	12372	direct sequencing
A	16223 16290 16319	663	+663HaeIII
R		12705	+12703MboII
R0	none	11719	+11718SmaI
R0a	16126 16362
HV	none	14766	-14766MseI
HV1	16067
HV2	16217
H	none	7028	-7025AluI
H1b	16189 16356
H6	16362 16482
H14	16256 16352
H20	16218 16328a
HV0	16298	72	direct sequencing
HV0a	16298	15904	direct sequencing
V	16298	4580	-4577NlaIII
R1	16278 16311
R2	16071	4769	+4769AluI
R5	16266 16304	8594	-8592MboI
R6	16129 16362
B	16189	8280 9bp del	PCR fragment length
F	16304	3970	direct sequencing
F1b	16189 16304	12406	-12406HpaI
J	16069 16126	13708	-13704BstNI
J1	none	3010	-3010BccI
J1	16069 16126 16145 16261
J1b	16069 16126 16145 16222 16261
J1c	HVS-II: 185 228
J1d	16069 16126 16193 16300
J2	none	15257	-15257AccI
J2a	16069 16126 16231
J2b	16069 16193 16126
T	16126 16294	13368	+13366BamHI
T1	16126 16163 16189 16294	12633a	direct sequencing
T1a	16126 16163 16186 16189 16294
T1b	16126 16163 16189 16243 16294
T2	16126 16294 16296	14233	direct sequencing
T2b	16126 16294 16304
U	none	12308	+12308HinfI
U1a	16189 16249
U1b	16249 16327
U2	16051
U2e	16051 16129c
U3	16343
U3a	16390	9266	direct sequencing
U3b	none	9656	direct sequencing
U4	16356	4646	+4646RsaI
U5	16270
U5a	16192 16270
U5a1	16192 16256 16270
U5a1a	16256 16270 16399
U5b	16189 16270
U6a	16172 16219 16278
U6a1	16172 16189 16219 16278
U7	16318t
U8b	16189 16234
K	16224 16311	9055	-9052HaeII
K1	none	10398	+10398DdeI
K1a1b1a	16224 16234 16311	10978 12954	direct sequencing
K2	none	9716	-9721BsaI, direct sequencing
