# Supplementary material for: Counting the Founders: The Matrilineal Genetic Ancestry of the Jewish Diaspora
Source: PLoS One. 2008 Apr 30;3(4):e2062. doi: 10.1371/journal.pone.0002062 (PMC2323359; doi:10.1371/journal.pone.0002062)
Supplement: Table S3 — Haplogroup distribution among the studied populations and communities (0.12 MB XLS) [file pone.0002062.s006.xls]

## Sheet: Table S3
Table S3
Haplogroup distribution among the studied populations and communities
	Azerbaijan				Georgia				Ethiopia				Bnei Israel				Cochin				Iran				Iraq				Libya				Morocco				Tunisia				Belmonte				Bulgaria				Turkey
	(n = 58)				(n = 74)				(n = 29)				(n = 34)				(n = 45)				(n = 82)				(n = 135)				(n = 83)				(n = 149)				(n = 37)				(n = 30)				(n = 71)				(n = 123)
Haplogroupa	N	%	lower	upper	N	%	lower	upper	N	%	lower	upper	N	%	lower	upper	N	%	lower	upper	N	%	lower	upper	N	%	lower	upper	N	%	lower	upper	N	%	lower	upper	N	%	lower	upper	N	%	lower	upper	N	%	lower	upper	N
D4	0	0	0	0.061621	0	0	0	0.0486276	0	0	0	0.119445	0	0	0	0.102818	0	0	0	0.0787051	0	0	0	0.0439895	0	0	0	0.0269551	0	0	0	0.0434712	0	0	0	0.0244536	0	0	0	0.0948906	0	0	0	0.115703	0	0	0	0.0506294	0
D5	0	0	0	0.061621	0	0	0	0.0486276	0	0	0	0.119445	0	0	0	0.102818	1	0.0222222	0.00056246	0.117704	0	0	0	0.0439895	0	0	0	0.0269551	0	0	0	0.0434712	0	0	0	0.0244536	0	0	0	0.0948906	0	0	0	0.115703	0	0	0	0.0506294	0
F1b	0	0	0	0.061621	1	0.0135135	0.000342074	0.0730074	0	0	0	0.119445	0	0	0	0.102818	0	0	0	0.0787051	0	0	0	0.0439895	0	0	0	0.0269551	0	0	0	0.0434712	0	0	0	0.0244536	0	0	0	0.0948906	0	0	0	0.115703	0	0	0	0.0506294	0
G2a	0	0	0	0.061621	0	0	0	0.0486276	0	0	0	0.119445	0	0	0	0.102818	0	0	0	0.0787051	0	0	0	0.0439895	0	0	0	0.0269551	0	0	0	0.0434712	0	0	0	0.0244536	0	0	0	0.0948906	0	0	0	0.115703	0	0	0	0.0506294	0
H	8	0.137931	0.0614797	0.25381	8	0.108108	0.047844	0.20195	0	0	0	0.119445	2	0.0588235	0.00720492	0.196773	0	0	0	0.0787051	6	0.0731707	0.0273249	0.152487	15	0.111111	0.0635377	0.176633	27	0.325301	0.226486	0.436999	55	0.369128	0.291612	0.45196	13	0.351351	0.2021	0.525389	2	0.0666667	0.00817813	0.220735	20	0.28169	0.181304	0.400996	43
H14	0	0	0	0.061621	0	0	0	0.0486276	0	0	0	0.119445	1	0.0294118	0.000744364	0.153268	0	0	0	0.0787051	10	0.121951	0.060058	0.212859	1	0.00740741	0.000187522	0.0405794	0	0	0	0.0434712	0	0	0	0.0244536	0	0	0	0.0948906	0	0	0	0.115703	0	0	0	0.0506294	0
H1b	0	0	0	0.061621	0	0	0	0.0486276	0	0	0	0.119445	0	0	0	0.102818	0	0	0	0.0787051	0	0	0	0.0439895	0	0	0	0.0269551	0	0	0	0.0434712	0	0	0	0.0244536	0	0	0	0.0948906	0	0	0	0.115703	0	0	0	0.0506294	0
H20	0	0	0	0.061621	0	0	0	0.0486276	0	0	0	0.119445	0	0	0	0.102818	0	0	0	0.0787051	0	0	0	0.0439895	0	0	0	0.0269551	0	0	0	0.0434712	0	0	0	0.0244536	0	0	0	0.0948906	0	0	0	0.115703	1	0.0140845	0.000356525	0.0759934	6
H6	0	0	0	0.061621	0	0	0	0.0486276	0	0	0	0.119445	0	0	0	0.102818	0	0	0	0.0787051	9	0.109756	0.0514322	0.198152	0	0	0	0.0269551	0	0	0	0.0434712	6	0.0402685	0.0149189	0.0855848	2	0.0540541	0.00661457	0.181949	0	0	0	0.115703	0	0	0	0.0506294	6
HV	0	0	0	0.061621	4	0.0540541	0.0149223	0.132655	0	0	0	0.119445	0	0	0	0.102818	0	0	0	0.0787051	0	0	0	0.0439895	0	0	0	0.0269551	2	0.0240964	0.00293162	0.0843474	1	0.00671141	0.000169904	0.0368249	0	0	0	0.0948906	0	0	0	0.115703	1	0.0140845	0.000356525	0.0759934	1
HV0	0	0	0	0.061621	0	0	0	0.0486276	0	0	0	0.119445	0	0	0	0.102818	0	0	0	0.0787051	0	0	0	0.0439895	0	0	0	0.0269551	0	0	0	0.0434712	4	0.0268456	0.00736194	0.0673072	0	0	0	0.0948906	28	0.933333	0.779265	0.991822	0	0	0	0.0506294	1
HV0a	0	0	0	0.061621	0	0	0	0.0486276	0	0	0	0.119445	0	0	0	0.102818	0	0	0	0.0787051	0	0	0	0.0439895	0	0	0	0.0269551	0	0	0	0.0434712	0	0	0	0.0244536	0	0	0	0.0948906	0	0	0	0.115703	0	0	0	0.0506294	1
HV1	0	0	0	0.061621	44	0.594595	0.474102	0.707274	0	0	0	0.119445	0	0	0	0.102818	0	0	0	0.0787051	0	0	0	0.0439895	0	0	0	0.0269551	0	0	0	0.0434712	10	0.0671141	0.0326506	0.119961	1	0.027027	0.000684031	0.141603	0	0	0	0.115703	0	0	0	0.0506294	2
HV2	0	0	0	0.061621	0	0	0	0.0486276	0	0	0	0.119445	0	0	0	0.102818	0	0	0	0.0787051	0	0	0	0.0439895	5	0.037037	0.0121333	0.0843146	0	0	0	0.0434712	0	0	0	0.0244536	0	0	0	0.0948906	0	0	0	0.115703	0	0	0	0.0506294	0
I	3	0.0517241	0.0107965	0.143805	1	0.0135135	0.000342074	0.0730074	0	0	0	0.119445	0	0	0	0.102818	0	0	0	0.0787051	0	0	0	0.0439895	6	0.0444444	0.0164825	0.0942259	0	0	0	0.0434712	9	0.0604027	0.0279891	0.111565	2	0.0540541	0.00661457	0.181949	0	0	0	0.115703	2	0.028169	0.00342979	0.0980801	0
J1	0	0	0	0.061621	1	0.0135135	0.000342074	0.0730074	0	0	0	0.119445	0	0	0	0.102818	0	0	0	0.0787051	4	0.0487805	0.013449	0.120212	3	0.0222222	0.00460641	0.0635684	1	0.0120482	0.000304987	0.0653084	3	0.0201342	0.00417157	0.0577116	0	0	0	0.0948906	0	0	0	0.115703	1	0.0140845	0.000356525	0.0759934	1
J1b	1	0.0172414	0.000436419	0.0923611	0	0	0	0.0486276	0	0	0	0.119445	0	0	0	0.102818	0	0	0	0.0787051	1	0.0121951	0.000308706	0.0660827	14	0.103704	0.0578662	0.167874	0	0	0	0.0434712	2	0.0134228	0.00162972	0.0476451	0	0	0	0.0948906	0	0	0	0.115703	0	0	0	0.0506294	1
J1c	0	0	0	0.061621	0	0	0	0.0486276	0	0	0	0.119445	0	0	0	0.102818	0	0	0	0.0787051	3	0.0365854	0.00760928	0.103215	11	0.0814815	0.0413775	0.141115	1	0.0120482	0.000304987	0.0653084	5	0.033557	0.010984	0.0765714	0	0	0	0.0948906	0	0	0	0.115703	1	0.0140845	0.000356525	0.0759934	3
J1d	0	0	0	0.061621	1	0.0135135	0.000342074	0.0730074	0	0	0	0.119445	0	0	0	0.102818	0	0	0	0.0787051	5	0.0609756	0.020093	0.136587	1	0.00740741	0.000187522	0.0405794	0	0	0	0.0434712	0	0	0	0.0244536	0	0	0	0.0948906	0	0	0	0.115703	2	0.028169	0.00342979	0.0980801	1
J2	0	0	0	0.061621	0	0	0	0.0486276	0	0	0	0.119445	0	0	0	0.102818	0	0	0	0.0787051	0	0	0	0.0439895	0	0	0	0.0269551	0	0	0	0.0434712	0	0	0	0.0244536	0	0	0	0.0948906	0	0	0	0.115703	0	0	0	0.0506294	0
J2a	0	0	0	0.061621	0	0	0	0.0486276	0	0	0	0.119445	0	0	0	0.102818	0	0	0	0.0787051	0	0	0	0.0439895	0	0	0	0.0269551	2	0.0240964	0.00293162	0.0843474	1	0.00671141	0.000169904	0.0368249	0	0	0	0.0948906	0	0	0	0.115703	0	0	0	0.0506294	4
J2b	34	0.586207	0.449266	0.714037	2	0.027027	0.00329002	0.0942443	0	0	0	0.119445	0	0	0	0.102818	0	0	0	0.0787051	0	0	0	0.0439895	1	0.00740741	0.000187522	0.0405794	0	0	0	0.0434712	3	0.0201342	0.00417157	0.0577116	0	0	0	0.0948906	0	0	0	0.115703	1	0.0140845	0.000356525	0.0759934	2
K1	0	0	0	0.061621	0	0	0	0.0486276	0	0	0	0.119445	0	0	0	0.102818	0	0	0	0.0787051	0	0	0	0.0439895	2	0.0148148	0.0017992	0.0524906	1	0.0120482	0.000304987	0.0653084	20	0.134228	0.0839573	0.199667	1	0.027027	0.000684031	0.141603	0	0	0	0.115703	9	0.126761	0.0596358	0.22704	7
K2	1	0.0172414	0.000436419	0.0923611	1	0.0135135	0.000342074	0.0730074	0	0	0	0.119445	0	0	0	0.102818	0	0	0	0.0787051	0	0	0	0.0439895	1	0.00740741	0.000187522	0.0405794	0	0	0	0.0434712	3	0.0201342	0.00417157	0.0577116	0	0	0	0.0948906	0	0	0	0.115703	2	0.028169	0.00342979	0.0980801	1
L0a1	0	0	0	0.061621	0	0	0	0.0486276	1	0.0344828	0.000872647	0.177644	0	0	0	0.102818	0	0	0	0.0787051	0	0	0	0.0439895	0	0	0	0.0269551	0	0	0	0.0434712	0	0	0	0.0244536	0	0	0	0.0948906	0	0	0	0.115703	0	0	0	0.0506294	0
L0a2	0	0	0	0.061621	0	0	0	0.0486276	3	0.103448	0.0218637	0.273515	0	0	0	0.102818	0	0	0	0.0787051	0	0	0	0.0439895	0	0	0	0.0269551	0	0	0	0.0434712	0	0	0	0.0244536	0	0	0	0.0948906	0	0	0	0.115703	0	0	0	0.0506294	0
L0f	0	0	0	0.061621	0	0	0	0.0486276	1	0.0344828	0.000872647	0.177644	0	0	0	0.102818	0	0	0	0.0787051	0	0	0	0.0439895	0	0	0	0.0269551	0	0	0	0.0434712	0	0	0	0.0244536	0	0	0	0.0948906	0	0	0	0.115703	0	0	0	0.0506294	0
L1b1	0	0	0	0.061621	0	0	0	0.0486276	0	0	0	0.119445	0	0	0	0.102818	0	0	0	0.0787051	0	0	0	0.0439895	0	0	0	0.0269551	0	0	0	0.0434712	1	0.00671141	0.000169904	0.0368249	0	0	0	0.0948906	0	0	0	0.115703	0	0	0	0.0506294	0
L2a	0	0	0	0.061621	0	0	0	0.0486276	1	0.0344828	0.000872647	0.177644	0	0	0	0.102818	0	0	0	0.0787051	0	0	0	0.0439895	0	0	0	0.0269551	0	0	0	0.0434712	0	0	0	0.0244536	0	0	0	0.0948906	0	0	0	0.115703	0	0	0	0.0506294	0
L2a1	0	0	0	0.061621	0	0	0	0.0486276	1	0.0344828	0.000872647	0.177644	0	0	0	0.102818	0	0	0	0.0787051	0	0	0	0.0439895	0	0	0	0.0269551	0	0	0	0.0434712	1	0.00671141	0.000169904	0.0368249	0	0	0	0.0948906	0	0	0	0.115703	0	0	0	0.0506294	0
L2b	0	0	0	0.061621	0	0	0	0.0486276	1	0.0344828	0.000872647	0.177644	0	0	0	0.102818	0	0	0	0.0787051	0	0	0	0.0439895	0	0	0	0.0269551	0	0	0	0.0434712	0	0	0	0.0244536	0	0	0	0.0948906	0	0	0	0.115703	0	0	0	0.0506294	0
L3	0	0	0	0.061621	0	0	0	0.0486276	0	0	0	0.119445	0	0	0	0.102818	0	0	0	0.0787051	0	0	0	0.0439895	0	0	0	0.0269551	0	0	0	0.0434712	0	0	0	0.0244536	0	0	0	0.0948906	0	0	0	0.115703	0	0	0	0.0506294	0
L3b	0	0	0	0.061621	0	0	0	0.0486276	1	0.0344828	0.000872647	0.177644	0	0	0	0.102818	0	0	0	0.0787051	0	0	0	0.0439895	0	0	0	0.0269551	3	0.0361446	0.00751682	0.102015	0	0	0	0.0244536	1	0.027027	0.000684031	0.141603	0	0	0	0.115703	0	0	0	0.0506294	0
L3e1	0	0	0	0.061621	0	0	0	0.0486276	0	0	0	0.119445	0	0	0	0.102818	0	0	0	0.0787051	0	0	0	0.0439895	0	0	0	0.0269551	0	0	0	0.0434712	0	0	0	0.0244536	0	0	0	0.0948906	0	0	0	0.115703	0	0	0	0.0506294	0
L3e1b	0	0	0	0.061621	0	0	0	0.0486276	0	0	0	0.119445	0	0	0	0.102818	0	0	0	0.0787051	0	0	0	0.0439895	0	0	0	0.0269551	0	0	0	0.0434712	0	0	0	0.0244536	0	0	0	0.0948906	0	0	0	0.115703	0	0	0	0.0506294	0
L3e3	0	0	0	0.061621	0	0	0	0.0486276	0	0	0	0.119445	0	0	0	0.102818	0	0	0	0.0787051	0	0	0	0.0439895	0	0	0	0.0269551	0	0	0	0.0434712	0	0	0	0.0244536	0	0	0	0.0948906	0	0	0	0.115703	0	0	0	0.0506294	0
L3f1	0	0	0	0.061621	0	0	0	0.0486276	0	0	0	0.119445	0	0	0	0.102818	0	0	0	0.0787051	0	0	0	0.0439895	0	0	0	0.0269551	0	0	0	0.0434712	0	0	0	0.0244536	0	0	0	0.0948906	0	0	0	0.115703	0	0	0	0.0506294	0
L3h	0	0	0	0.061621	0	0	0	0.0486276	2	0.0689655	0.00846396	0.227662	0	0	0	0.102818	0	0	0	0.0787051	0	0	0	0.0439895	0	0	0	0.0269551	0	0	0	0.0434712	0	0	0	0.0244536	0	0	0	0.0948906	0	0	0	0.115703	0	0	0	0.0506294	0
L3x	0	0	0	0.061621	0	0	0	0.0486276	0	0	0	0.119445	0	0	0	0.102818	0	0	0	0.0787051	0	0	0	0.0439895	0	0	0	0.0269551	0	0	0	0.0434712	0	0	0	0.0244536	0	0	0	0.0948906	0	0	0	0.115703	0	0	0	0.0506294	0
L3x1	0	0	0	0.061621	0	0	0	0.0486276	1	0.0344828	0.000872647	0.177644	0	0	0	0.102818	0	0	0	0.0787051	0	0	0	0.0439895	0	0	0	0.0269551	0	0	0	0.0434712	0	0	0	0.0244536	0	0	0	0.0948906	0	0	0	0.115703	0	0	0	0.0506294	0
L4	0	0	0	0.061621	0	0	0	0.0486276	0	0	0	0.119445	0	0	0	0.102818	0	0	0	0.0787051	0	0	0	0.0439895	0	0	0	0.0269551	0	0	0	0.0434712	0	0	0	0.0244536	0	0	0	0.0948906	0	0	0	0.115703	0	0	0	0.0506294	0
L4a	0	0	0	0.061621	0	0	0	0.0486276	0	0	0	0.119445	0	0	0	0.102818	0	0	0	0.0787051	0	0	0	0.0439895	0	0	0	0.0269551	0	0	0	0.0434712	0	0	0	0.0244536	0	0	0	0.0948906	0	0	0	0.115703	0	0	0	0.0506294	0
L4g	0	0	0	0.061621	0	0	0	0.0486276	1	0.0344828	0.000872647	0.177644	0	0	0	0.102818	0	0	0	0.0787051	0	0	0	0.0439895	0	0	0	0.0269551	0	0	0	0.0434712	0	0	0	0.0244536	0	0	0	0.0948906	0	0	0	0.115703	0	0	0	0.0506294	0
L5	0	0	0	0.061621	0	0	0	0.0486276	2	0.0689655	0.00846396	0.227662	0	0	0	0.102818	0	0	0	0.0787051	0	0	0	0.0439895	0	0	0	0.0269551	0	0	0	0.0434712	0	0	0	0.0244536	0	0	0	0.0948906	0	0	0	0.115703	0	0	0	0.0506294	0
L6	0	0	0	0.061621	0	0	0	0.0486276	1	0.0344828	0.000872647	0.177644	0	0	0	0.102818	0	0	0	0.0787051	0	0	0	0.0439895	0	0	0	0.0269551	0	0	0	0.0434712	0	0	0	0.0244536	0	0	0	0.0948906	0	0	0	0.115703	0	0	0	0.0506294	0
M	0	0	0	0.061621	0	0	0	0.0486276	0	0	0	0.119445	24	0.705882	0.525219	0.849016	10	0.222222	0.112046	0.370888	1	0.0121951	0.000308706	0.0660827	0	0	0	0.0269551	0	0	0	0.0434712	0	0	0	0.0244536	0	0	0	0.0948906	0	0	0	0.115703	0	0	0	0.0506294	0
M1a1	0	0	0	0.061621	0	0	0	0.0486276	3	0.103448	0.0218637	0.273515	0	0	0	0.102818	0	0	0	0.0787051	0	0	0	0.0439895	3	0.0222222	0.00460641	0.0635684	0	0	0	0.0434712	0	0	0	0.0244536	0	0	0	0.0948906	0	0	0	0.115703	0	0	0	0.0506294	0
M1a2	0	0	0	0.061621	0	0	0	0.0486276	2	0.0689655	0.00846396	0.227662	0	0	0	0.102818	0	0	0	0.0787051	0	0	0	0.0439895	0	0	0	0.0269551	0	0	0	0.0434712	0	0	0	0.0244536	0	0	0	0.0948906	0	0	0	0.115703	0	0	0	0.0506294	0
M1b1	0	0	0	0.061621	0	0	0	0.0486276	0	0	0	0.119445	0	0	0	0.102818	0	0	0	0.0787051	0	0	0	0.0439895	0	0	0	0.0269551	0	0	0	0.0434712	0	0	0	0.0244536	0	0	0	0.0948906	0	0	0	0.115703	0	0	0	0.0506294	0
M30	0	0	0	0.061621	0	0	0	0.0486276	0	0	0	0.119445	4	0.117647	0.0330017	0.274503	1	0.0222222	0.00056246	0.117704	0	0	0	0.0439895	0	0	0	0.0269551	0	0	0	0.0434712	0	0	0	0.0244536	0	0	0	0.0948906	0	0	0	0.115703	0	0	0	0.0506294	0
M5a	0	0	0	0.061621	0	0	0	0.0486276	0	0	0	0.119445	0	0	0	0.102818	12	0.266667	0.146041	0.419447	0	0	0	0.0439895	0	0	0	0.0269551	0	0	0	0.0434712	0	0	0	0.0244536	0	0	0	0.0948906	0	0	0	0.115703	0	0	0	0.0506294	0
N	0	0	0	0.061621	0	0	0	0.0486276	0	0	0	0.119445	0	0	0	0.102818	2	0.0444444	0.00542849	0.151493	3	0.0365854	0.00760928	0.103215	0	0	0	0.0269551	0	0	0	0.0434712	0	0	0	0.0244536	0	0	0	0.0948906	0	0	0	0.115703	0	0	0	0.0506294	0
N1a	0	0	0	0.061621	0	0	0	0.0486276	1	0.0344828	0.000872647	0.177644	0	0	0	0.102818	0	0	0	0.0787051	0	0	0	0.0439895	0	0	0	0.0269551	0	0	0	0.0434712	0	0	0	0.0244536	0	0	0	0.0948906	0	0	0	0.115703	0	0	0	0.0506294	0
N1b	0	0	0	0.061621	1	0.0135135	0.000342074	0.0730074	0	0	0	0.119445	0	0	0	0.102818	0	0	0	0.0787051	0	0	0	0.0439895	3	0.0222222	0.00460641	0.0635684	0	0	0	0.0434712	1	0.00671141	0.000169904	0.0368249	0	0	0	0.0948906	0	0	0	0.115703	4	0.056338	0.0155616	0.138011	2
N2a	0	0	0	0.061621	0	0	0	0.0486276	0	0	0	0.119445	0	0	0	0.102818	0	0	0	0.0787051	0	0	0	0.0439895	0	0	0	0.0269551	2	0.0240964	0.00293162	0.0843474	0	0	0	0.0244536	0	0	0	0.0948906	0	0	0	0.115703	1	0.0140845	0.000356525	0.0759934	0
N9a	0	0	0	0.061621	0	0	0	0.0486276	0	0	0	0.119445	0	0	0	0.102818	0	0	0	0.0787051	0	0	0	0.0439895	0	0	0	0.0269551	0	0	0	0.0434712	0	0	0	0.0244536	0	0	0	0.0948906	0	0	0	0.115703	0	0	0	0.0506294	2
R	0	0	0	0.061621	0	0	0	0.0486276	0	0	0	0.119445	3	0.0882353	0.0185795	0.236775	7	0.155556	0.0649092	0.294552	0	0	0	0.0439895	0	0	0	0.0269551	0	0	0	0.0434712	0	0	0	0.0244536	0	0	0	0.0948906	0	0	0	0.115703	0	0	0	0.0506294	1
R0	0	0	0	0.061621	0	0	0	0.0486276	0	0	0	0.119445	0	0	0	0.102818	0	0	0	0.0787051	0	0	0	0.0439895	0	0	0	0.0269551	0	0	0	0.0434712	0	0	0	0.0244536	0	0	0	0.0948906	0	0	0	0.115703	1	0.0140845	0.000356525	0.0759934	0
R0a	0	0	0	0.061621	0	0	0	0.0486276	3	0.103448	0.0218637	0.273515	0	0	0	0.102818	0	0	0	0.0787051	1	0.0121951	0.000308706	0.0660827	0	0	0	0.0269551	4	0.0481928	0.0132851	0.118818	1	0.00671141	0.000169904	0.0368249	3	0.0810811	0.0170435	0.219096	0	0	0	0.115703	2	0.028169	0.00342979	0.0980801	0
R2	0	0	0	0.061621	0	0	0	0.0486276	0	0	0	0.119445	0	0	0	0.102818	0	0	0	0.0787051	0	0	0	0.0439895	3	0.0222222	0.00460641	0.0635684	0	0	0	0.0434712	1	0.00671141	0.000169904	0.0368249	0	0	0	0.0948906	0	0	0	0.115703	0	0	0	0.0506294	0
R5	0	0	0	0.061621	0	0	0	0.0486276	0	0	0	0.119445	0	0	0	0.102818	5	0.111111	0.0370767	0.240536	0	0	0	0.0439895	0	0	0	0.0269551	0	0	0	0.0434712	0	0	0	0.0244536	0	0	0	0.0948906	0	0	0	0.115703	0	0	0	0.0506294	0
T1a	0	0	0	0.061621	0	0	0	0.0486276	0	0	0	0.119445	0	0	0	0.102818	0	0	0	0.0787051	2	0.0243902	0.00296754	0.0853432	2	0.0148148	0.0017992	0.0524906	1	0.0120482	0.000304987	0.0653084	0	0	0	0.0244536	0	0	0	0.0948906	0	0	0	0.115703	1	0.0140845	0.000356525	0.0759934	1
T1b	0	0	0	0.061621	0	0	0	0.0486276	0	0	0	0.119445	0	0	0	0.102818	0	0	0	0.0787051	0	0	0	0.0439895	0	0	0	0.0269551	0	0	0	0.0434712	0	0	0	0.0244536	0	0	0	0.0948906	0	0	0	0.115703	0	0	0	0.0506294	1
T2	5	0.0862069	0.028586	0.189826	7	0.0945946	0.038884	0.185238	0	0	0	0.119445	0	0	0	0.102818	0	0	0	0.0787051	14	0.170732	0.0966053	0.269836	27	0.2	0.136132	0.277487	1	0.0120482	0.000304987	0.0653084	1	0.00671141	0.000169904	0.0368249	0	0	0	0.0948906	0	0	0	0.115703	7	0.0985915	0.0405662	0.192644	8
T2b	0	0	0	0.061621	0	0	0	0.0486276	0	0	0	0.119445	0	0	0	0.102818	0	0	0	0.0787051	1	0.0121951	0.000308706	0.0660827	0	0	0	0.0269551	0	0	0	0.0434712	1	0.00671141	0.000169904	0.0368249	1	0.027027	0.000684031	0.141603	0	0	0	0.115703	1	0.0140845	0.000356525	0.0759934	3
U	0	0	0	0.061621	0	0	0	0.0486276	0	0	0	0.119445	0	0	0	0.102818	0	0	0	0.0787051	0	0	0	0.0439895	0	0	0	0.0269551	0	0	0	0.0434712	0	0	0	0.0244536	0	0	0	0.0948906	0	0	0	0.115703	1	0.0140845	0.000356525	0.0759934	2
U1a	0	0	0	0.061621	3	0.0405405	0.00843976	0.113937	1	0.0344828	0.000872647	0.177644	0	0	0	0.102818	6	0.133333	0.0505424	0.267925	5	0.0609756	0.020093	0.136587	0	0	0	0.0269551	1	0.0120482	0.000304987	0.0653084	1	0.00671141	0.000169904	0.0368249	0	0	0	0.0948906	0	0	0	0.115703	0	0	0	0.0506294	2
U1b	0	0	0	0.061621	0	0	0	0.0486276	0	0	0	0.119445	0	0	0	0.102818	0	0	0	0.0787051	0	0	0	0.0439895	0	0	0	0.0269551	0	0	0	0.0434712	0	0	0	0.0244536	0	0	0	0.0948906	0	0	0	0.115703	0	0	0	0.0506294	1
U2	0	0	0	0.061621	0	0	0	0.0486276	1	0.0344828	0.000872647	0.177644	0	0	0	0.102818	0	0	0	0.0787051	0	0	0	0.0439895	0	0	0	0.0269551	0	0	0	0.0434712	0	0	0	0.0244536	0	0	0	0.0948906	0	0	0	0.115703	0	0	0	0.0506294	0
U2e	0	0	0	0.061621	0	0	0	0.0486276	0	0	0	0.119445	0	0	0	0.102818	0	0	0	0.0787051	1	0.0121951	0.000308706	0.0660827	1	0.00740741	0.000187522	0.0405794	0	0	0	0.0434712	0	0	0	0.0244536	0	0	0	0.0948906	0	0	0	0.115703	0	0	0	0.0506294	0
U3a	0	0	0	0.061621	0	0	0	0.0486276	0	0	0	0.119445	0	0	0	0.102818	0	0	0	0.0787051	1	0.0121951	0.000308706	0.0660827	4	0.0296296	0.0081309	0.0741252	0	0	0	0.0434712	0	0	0	0.0244536	0	0	0	0.0948906	0	0	0	0.115703	0	0	0	0.0506294	1
U3b	2	0.0344828	0.00420365	0.119077	0	0	0	0.0486276	0	0	0	0.119445	0	0	0	0.102818	0	0	0	0.0787051	1	0.0121951	0.000308706	0.0660827	11	0.0814815	0.0413775	0.141115	0	0	0	0.0434712	1	0.00671141	0.000169904	0.0368249	0	0	0	0.0948906	0	0	0	0.115703	0	0	0	0.0506294	0
U4	0	0	0	0.061621	0	0	0	0.0486276	0	0	0	0.119445	0	0	0	0.102818	0	0	0	0.0787051	1	0.0121951	0.000308706	0.0660827	0	0	0	0.0269551	0	0	0	0.0434712	3	0.0201342	0.00417157	0.0577116	3	0.0810811	0.0170435	0.219096	0	0	0	0.115703	2	0.028169	0.00342979	0.0980801	3
U5	0	0	0	0.061621	0	0	0	0.0486276	0	0	0	0.119445	0	0	0	0.102818	0	0	0	0.0787051	0	0	0	0.0439895	0	0	0	0.0269551	0	0	0	0.0434712	1	0.00671141	0.000169904	0.0368249	0	0	0	0.0948906	0	0	0	0.115703	0	0	0	0.0506294	0
U5a	0	0	0	0.061621	0	0	0	0.0486276	0	0	0	0.119445	0	0	0	0.102818	0	0	0	0.0787051	0	0	0	0.0439895	0	0	0	0.0269551	0	0	0	0.0434712	0	0	0	0.0244536	1	0.027027	0.000684031	0.141603	0	0	0	0.115703	0	0	0	0.0506294	0
U5a1	0	0	0	0.061621	0	0	0	0.0486276	0	0	0	0.119445	0	0	0	0.102818	0	0	0	0.0787051	0	0	0	0.0439895	0	0	0	0.0269551	1	0.0120482	0.000304987	0.0653084	0	0	0	0.0244536	0	0	0	0.0948906	0	0	0	0.115703	2	0.028169	0.00342979	0.0980801	1
U5a1a	0	0	0	0.061621	0	0	0	0.0486276	0	0	0	0.119445	0	0	0	0.102818	0	0	0	0.0787051	0	0	0	0.0439895	0	0	0	0.0269551	0	0	0	0.0434712	1	0.00671141	0.000169904	0.0368249	0	0	0	0.0948906	0	0	0	0.115703	0	0	0	0.0506294	0
U5b	0	0	0	0.061621	0	0	0	0.0486276	0	0	0	0.119445	0	0	0	0.102818	0	0	0	0.0787051	0	0	0	0.0439895	0	0	0	0.0269551	1	0.0120482	0.000304987	0.0653084	1	0.00671141	0.000169904	0.0368249	0	0	0	0.0948906	0	0	0	0.115703	1	0.0140845	0.000356525	0.0759934	0
U6a	0	0	0	0.061621	0	0	0	0.0486276	0	0	0	0.119445	0	0	0	0.102818	0	0	0	0.0787051	0	0	0	0.0439895	0	0	0	0.0269551	0	0	0	0.0434712	0	0	0	0.0244536	1	0.027027	0.000684031	0.141603	0	0	0	0.115703	0	0	0	0.0506294	0
U6a1	0	0	0	0.061621	0	0	0	0.0486276	1	0.0344828	0.000872647	0.177644	0	0	0	0.102818	0	0	0	0.0787051	0	0	0	0.0439895	0	0	0	0.0269551	0	0	0	0.0434712	2	0.0134228	0.00162972	0.0476451	0	0	0	0.0948906	0	0	0	0.115703	2	0.028169	0.00342979	0.0980801	1
U7	3	0.0517241	0.0107965	0.143805	0	0	0	0.0486276	0	0	0	0.119445	0	0	0	0.102818	0	0	0	0.0787051	8	0.097561	0.0430688	0.183214	3	0.0222222	0.00460641	0.0635684	1	0.0120482	0.000304987	0.0653084	0	0	0	0.0244536	0	0	0	0.0948906	0	0	0	0.115703	0	0	0	0.0506294	0
U8b	0	0	0	0.061621	0	0	0	0.0486276	0	0	0	0.119445	0	0	0	0.102818	0	0	0	0.0787051	0	0	0	0.0439895	2	0.0148148	0.0017992	0.0524906	0	0	0	0.0434712	0	0	0	0.0244536	0	0	0	0.0948906	0	0	0	0.115703	2	0.028169	0.00342979	0.0980801	1
V	0	0	0	0.061621	0	0	0	0.0486276	0	0	0	0.119445	0	0	0	0.102818	0	0	0	0.0787051	0	0	0	0.0439895	1	0.00740741	0.000187522	0.0405794	1	0.0120482	0.000304987	0.0653084	1	0.00671141	0.000169904	0.0368249	2	0.0540541	0.00661457	0.181949	0	0	0	0.115703	0	0	0	0.0506294	3
W	0	0	0	0.061621	0	0	0	0.0486276	1	0.0344828	0.000872647	0.177644	0	0	0	0.102818	1	0.0222222	0.00056246	0.117704	1	0.0121951	0.000308706	0.0660827	14	0.103704	0.0578662	0.167874	0	0	0	0.0434712	0	0	0	0.0244536	0	0	0	0.0948906	0	0	0	0.115703	0	0	0	0.0506294	0
X1	1	0.0172414	0.000436419	0.0923611	0	0	0	0.0486276	0	0	0	0.119445	0	0	0	0.102818	0	0	0	0.0787051	3	0.0365854	0.00760928	0.103215	1	0.00740741	0.000187522	0.0405794	0	0	0	0.0434712	0	0	0	0.0244536	0	0	0	0.0948906	0	0	0	0.115703	0	0	0	0.0506294	0
X2	0	0	0	0.061621	0	0	0	0.0486276	0	0	0	0.119445	0	0	0	0.102818	0	0	0	0.0787051	0	0	0	0.0439895	0	0	0	0.0269551	0	0	0	0.0434712	1	0.00671141	0.000169904	0.0368249	0	0	0	0.0948906	0	0	0	0.115703	3	0.0422535	0.00879992	0.118555	8
X2b	0	0	0	0.061621	0	0	0	0.0486276	0	0	0	0.119445	0	0	0	0.102818	0	0	0	0.0787051	0	0	0	0.0439895	0	0	0	0.0269551	0	0	0	0.0434712	8	0.0536913	0.0234621	0.103051	0	0	0	0.0948906	0	0	0	0.115703	0	0	0	0.0506294	1
X2d	0	0	0	0.061621	0	0	0	0.0486276	0	0	0	0.119445	0	0	0	0.102818	0	0	0	0.0787051	1	0.0121951	0.000308706	0.0660827	0	0	0	0.0269551	0	0	0	0.0434712	0	0	0	0.0244536	0	0	0	0.0948906	0	0	0	0.115703	1	0.0140845	0.000356525	0.0759934	0
X2e	0	0	0	0.061621	0	0	0	0.0486276	0	0	0	0.119445	0	0	0	0.102818	0	0	0	0.0787051	0	0	0	0.0439895	0	0	0	0.0269551	33	0.39759	0.291737	0.510974	0	0	0	0.0244536	6	0.162162	0.0619257	0.320137	0	0	0	0.115703	0	0	0	0.0506294	1
aHg distribution according to the initial Hg labeling. Confidence intervals follow Pearson.
[truncated: 19 more columns]
